# Supplementary material for: Oral coniferyl ferulate attenuated depression symptoms in mice via reshaping gut microbiota and microbial metabolism
Source: Royal Society of Chemistry journal article supplement (doi:10.1039/d1fo02655k), 2021-01-01

## Supporting Information

Figure 1: CF intake alleviate CUMS-induced weight loss and depressive-like behaviors.

(A) Body weight on week0. (B) Body weight on week8. (C) Body weight on week12.

(D) SPT on week0. (E) OFT on week8. Data represent the mean  $\pm$  SEM of ten mice in

each group.  $**P < 0.01$  versus the control group;  $\#P < 0.05$ ,  $\#\#P < 0.01$  versus the CUMS group.

Figure 2: Spearman's correlation between the significantly altered intestinal microbiota and significantly altered metabolites in the colonic content samples (Negative mode).

$*P < 0.05$ ,  $**P < 0.01$ ,  $***P < 0.001$ .

Figure 3: Spearman's correlation between the significantly altered intestinal microbiota and significantly altered metabolites in the colonic content samples (Positive mode).

$*P < 0.05$ ,  $**P < 0.01$ ,  $***P < 0.001$ .

Figure 1

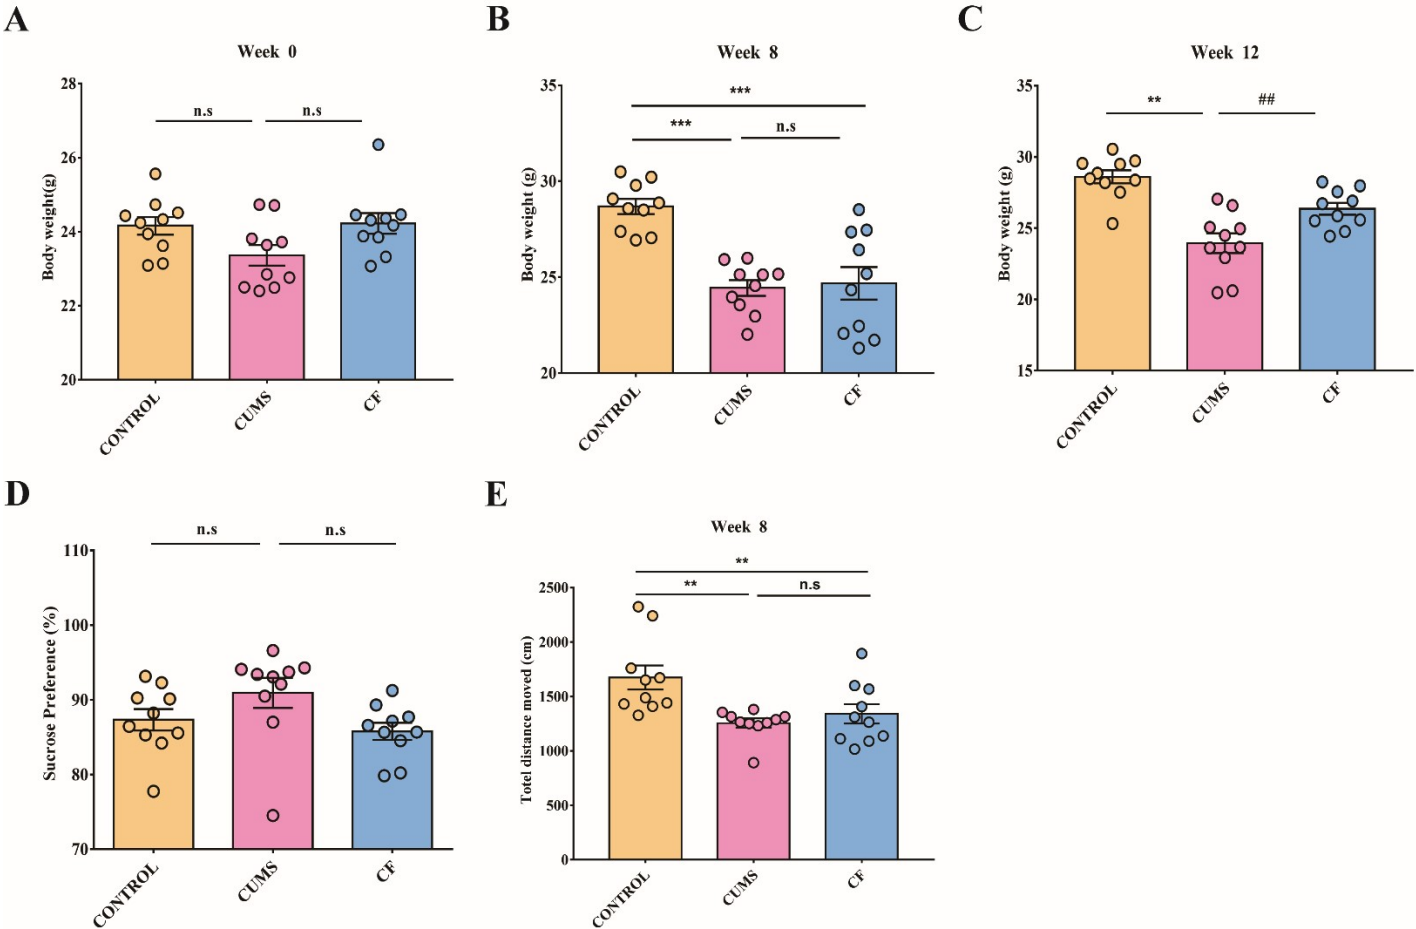

Figure 2

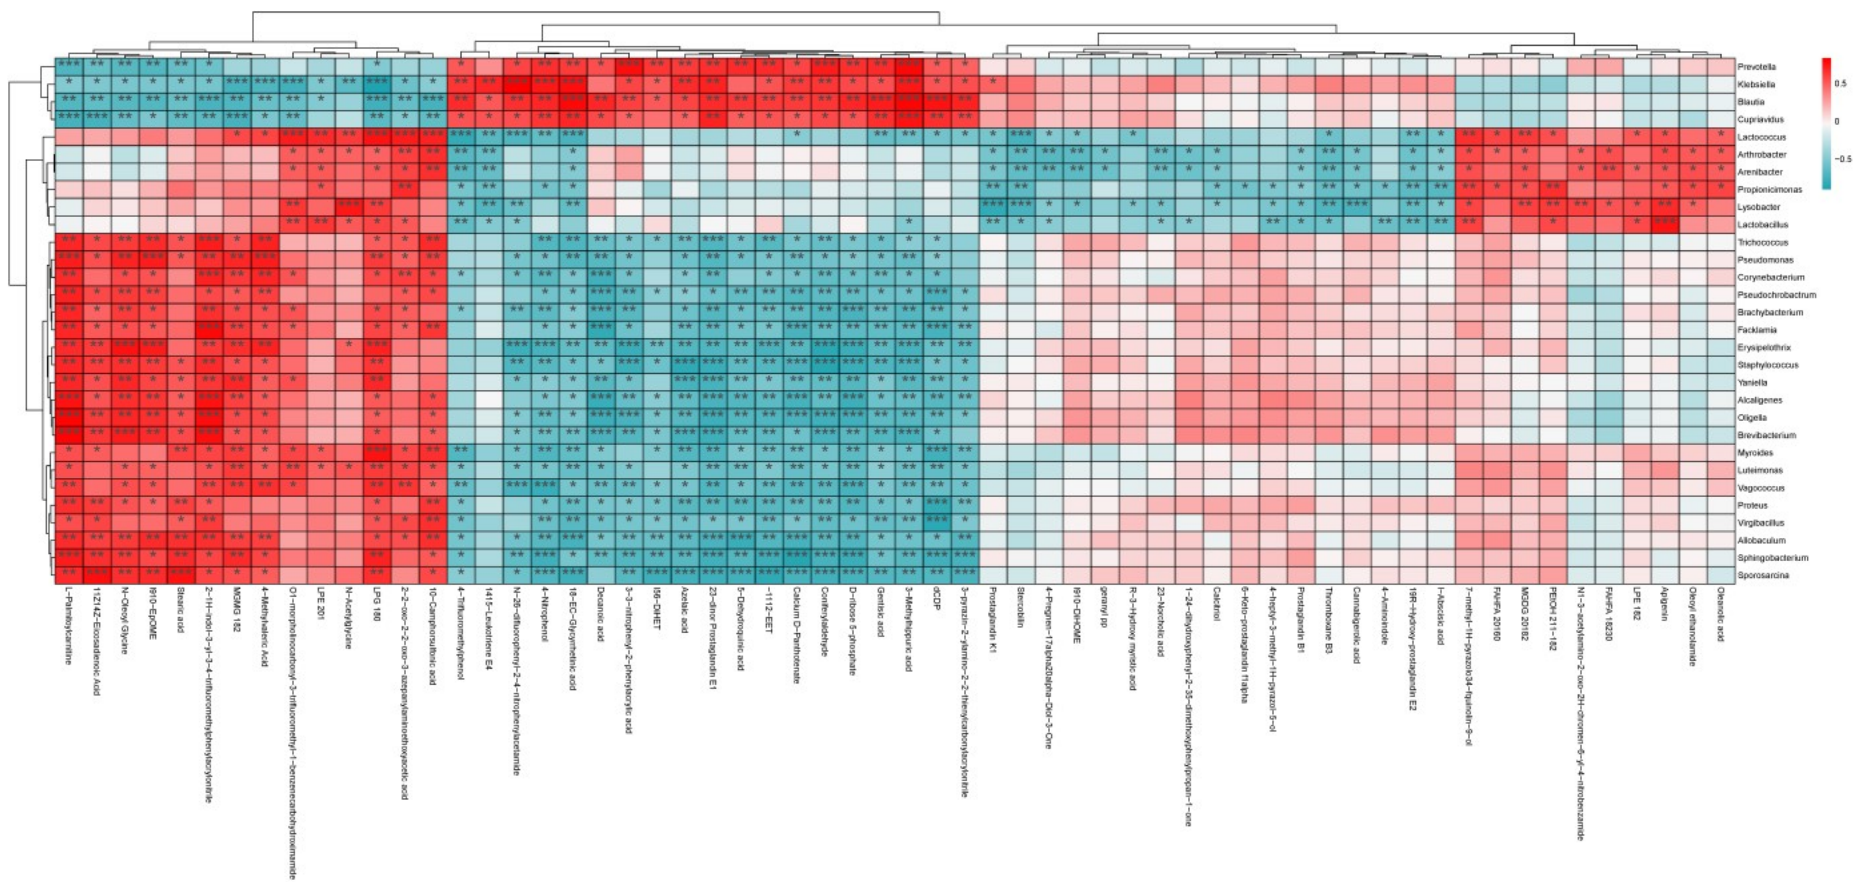

Supplement: d1fo02655k1.pdf [file d1fo02655k1.pdf]
